# Supplementary material for: Silent Existence of Eosinopenia in Sepsis: A Systematic Review and Meta-Analysis
Source: Research Square preprint supplement (doi:10.21203/rs.3.rs-107733/v1), 2020-11-23
Supplement: Supplementary file 1 [file 3a7d1f67a22d3a0d2967274b.docx]

Supplementary Table 3: subgroup analysis for different cutoffs

| Cutoff | No. of studies | Sensitivity | I2(%) | Specificity | I2(%) |
| --- | --- | --- | --- | --- | --- |
| 50 | 5 | 0.61(0.56-0.65) | 96.9 | 0,61(0.57-0.64) | 94.5 |
| 40 | 2 | 0.79(0.72-0.85) | 0 | 0.75(0.69-0.80) | 20.1 |
| <=25 | 3 | 0.57(0.51-0.63) | 80.7 | 0.83(0.80-0.85) | 98.2 |
| 100 | 2 | 0.54(0.48-0.61) | 96.2 | 0.51(0.48-0.55) | 97.4 |
