# Supplementary material for: Silent Existence of Eosinopenia in Sepsis: A Systematic Review and Meta-Analysis
Source: Research Square preprint supplement (doi:10.21203/rs.3.rs-107733/v1), 2020-11-23
Supplement: Supplementary file 2 [file 5cb08d0ad09d4b47b1a44fae.docx]

(("Eosinophils"[Mesh]) OR ((eosinophil*[Title/Abstract]) OR (eosinopenia[Title/Abstract]))) AND (("Sepsis"[Mesh]) OR (((((((((((((((septic[Title/Abstract]) OR (Pyemia[Title/Abstract])) OR (Pyemias[Title/Abstract])) OR (Pyohemia[Title/Abstract])) OR (Pyohemias[Title/Abstract])) OR (Pyaemia[Title/Abstract])) OR (Pyaemias[Title/Abstract])) OR (Septicemia[Title/Abstract])) OR (Septicemias[Title/Abstract])) OR ("Poisoning, Blood"[Title/Abstract])) OR ("Blood Poisoning"[Title/Abstract])) OR ("Blood Poisonings"[Title/Abstract])) OR ("Poisonings, Blood"[Title/Abstract])) OR ("Severe Sepsis"[Title/Abstract])) OR ("Sepsis, Severe"[Title/Abstract])))

To reduce the number of results, for searches in Embase and Web of Science, we also used the search terms “NOT (review OR letter OR editorial OR” animal experiment” OR “proceeding paper” OR “poster presentation” OR “meta-analysis” OR “case report”)”

Cochrane library

ID Search Hits

#1 MeSH descriptor: [Sepsis] explode all trees 4453

#2 (eosinopenia or eosinophil):ti,ab,kw (Word variations have been searched) 4293

#3 MeSH descriptor: [Eosinophils] explode all trees 779

#4 #2 or #3 4293

#5 (sepsis):ti,ab,kw OR (Pyemia):ti,ab,kw OR (Pyemias):ti,ab,kw OR (Pyohemia):ti,ab,kw OR (Pyohemias):ti,ab,kw 10701

#6 (Pyaemia):ti,ab,kw OR (Pyaemias):ti,ab,kw OR (Septicemia):ti,ab,kw OR (Septicemias):ti,ab,kw OR (Poisoning, Blood):ti,ab,kw 1608

#7 (Blood Poisoning):ti,ab,kw OR (Blood Poisonings):ti,ab,kw OR (Poisonings, Blood):ti,ab,kw OR (Severe Sepsis):ti,ab,kw OR (Sepsis, Severe):ti,ab,kw 3319

#8 (septic):ti,ab,kw 4344

#9 #1 or #5 or #6 or #7 or #8 15622

#10 #4 and #9 20
