# Supplementary material for: Silent Existence of Eosinopenia in Sepsis: A Systematic Review and Meta-Analysis
Source: Research Square preprint supplement (doi:10.21203/rs.3.rs-107733/v1), 2020-11-23
Supplement: Supplementary file 3 [file 85e4b3f743981d05ecfc8b15.docx]

Supplementary Table 2: Sensitivity analysis by omitting one study at a time

| Omitted study | Sensitivity（95%CI） | Specificity（95%CI） | DOR（95%CI） | AUROC（95%CI） | I2（95%CI） |
| --- | --- | --- | --- | --- | --- |
| Abidi(1) | 0.65（0.51，0.77） | 0.65（0.53，0.76） | 3.47（1.94，6.19） | 0.70（0.66，0.74） | 99（99，100） |
| Abidi(2) | 0.65（0.51，0.77） | 0.67（0.54，0.78） | 3.69（2.01，6.80） | 0.71（0.67，0.75） | 99（99，100） |
| Anand | 0.70（0.59，0.79） | 0.68（0.54，0.79） | 4,93（2.69，9.03） | 0.75（0.71，0.78） | 99（99，100） |
| Garnacho | 0.67（0.52，0.78） | 0.71（0.60，0.80） | 4.90（2.66，9.02） | 0.75（0.71，0.78） | 99（99，100） |
| Lavoignet (1) | 0.66（0.52，0.78） | 0.70（0.58，0.80） | 4.56（2.32，8.96） | 0.74（0.70，0.77） | 99（98，99） |
| Lavoignet (2) | 0.67（0.53，0.79） | 0.69（0.55，0.80） | 4.41（2.19，8.90） | 0.73（0.69，0.77） | 99（99，100） |
| Lavoignet (3) | 0.68（0.55，0.79） | 0.65（0.53，0.75） | 3.90（2.07，7.35） | 0.71（0.67，0.75） | 98（98，99） |
| Lopez (1) | 0.66（0.52，0.78） | 0.68（0.54，0.79） | 4.17（2.15，8.08） | 0.72（0.68，0.76） | 99（99，100） |
| Lopez (2) | 0.63（0.51，0.73） | 0.71（0.59，0.80） | 4.00（2.12，7.56） | 0.72（0.68，0.76） | 99（98，99） |
| Lopez (3) | 0.65（0.51，0.77） | 0.68（0.54，0.79） | 3.91（2.07，7.41） | 0.72（0.67，0.75） | 99（99，100） |
| Moura | 0.69（0.56，0.79） | 0.68（0.54，0.79） | 4.69（2.47，8.90） | 0.74（0.70，0.78） | 99（99，100） |
| Shaaban | 0.65（0.51，0.77） | 0.68（0.55，0.79） | 4.00（2.12，7.56） | 0.72（0.68，0.76） | 99（99，100） |
